# Supplementary material
Source: publisher figshare collection journal article supplement (https://acs.figshare.com/ndownloader/files/14660801)
Supplement: Supplementary file 1 [file 14660801]

## Supporting Information

**Characterization of a regulator *pgsR* on endogenous plasmid p2Sip and its  
complementation for poly-( $\gamma$ -glutamic acid) accumulation in *Bacillus  
amyloliquefaciens***

**Yibin Qiu,<sup>†,§</sup> Yifan Zhu,<sup>†,§</sup> Yatao Zhang,<sup>†,§</sup> Yuanyuan Sha,<sup>†,§</sup> Zongqi Xu,<sup>†,§</sup> Sha  
Li,<sup>†,§</sup> Xiaohai Feng,<sup>†,§</sup> Hong Xu<sup>\*,†,§</sup>**

<sup>†</sup> *State Key Laboratory of Materials-Oriented Chemical Engineering, Nanjing 211816,  
China*

<sup>§</sup> *College of Food Science and Light Industry, Nanjing Tech University, Nanjing  
211816, China*

<sup>\*</sup> Corresponding Author at Nanjing Tech University, Nanjing 211816, China

Tel/Fax: +86-25-58139433

*E-mail* address: xuh@njtech.edu.cn (Hong Xu)

## Figures

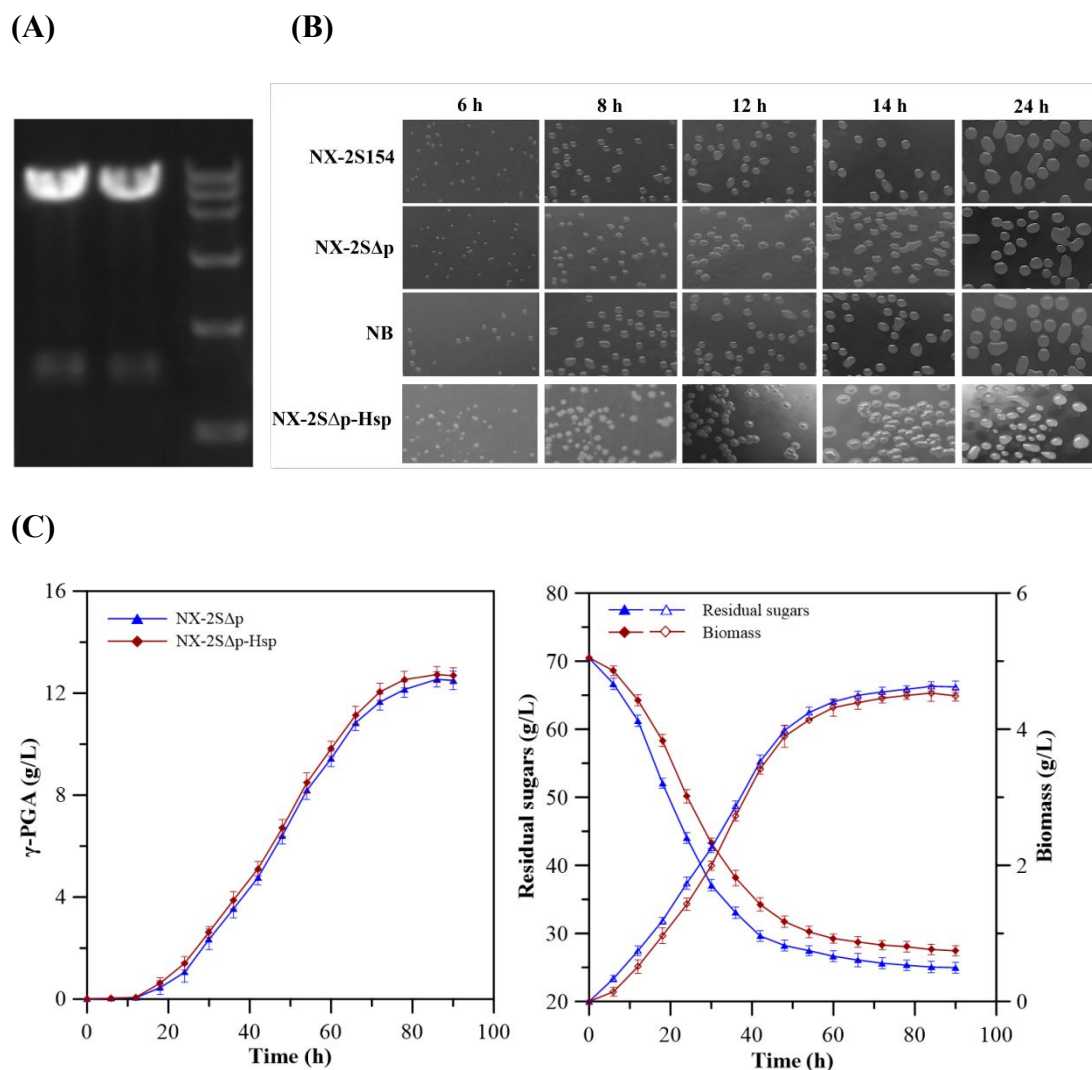

**Figure S1.** Functional analysis of *hsp* expression on  $\gamma$ -PGA synthesis in NX-2SDelta p. (A) Restriction analysis of recombinant plasmid pNX-*hsp*. Lanes 1 and 2: pNX-*hsp* digested with SpeI and NotI; (B)  $\gamma$ -PGA colony morphologies of the different derivatives. NX-2S154, the parent strain; NX-2SDelta p, the plasmid-cured strain; NB, the *pgsR* cassette harbored strain; NX-2SDelta p-Hsp, Overexpression of the *Hsp* gene in the plasmid-cured strain. (C) Kinetics of  $\gamma$ -PGA fermentation from raw inulin extract by different NX-2SDelta p and NX-2SDelta p-Hsp. Blue symbols denoted biomass and residual sugars of NX-2SDelta p, and red symbols denoted biomass and residual sugars of NX-2SDelta p-Hsp.
